# Supplementary material for: Visual attention, EEG alpha power and T7-Fz connectivity are implicated in prosthetic hand control and can be optimized through gaze training
Source: Springer Nature journal article supplement (doi:10.1186/s12984-019-0524-x), 2019-04-27

## Additional File 1: Transfer tea-making task gaze behaviour analyses

**Table S1.** Details of the 17 task phases identified for our transfer task, with each phase onset and offset indicated.

| # | Task phase       | Onset                      | Offset          | Screenshot                                                                           |
|---|------------------|----------------------------|-----------------|--------------------------------------------------------------------------------------|
| 1 | Mug transport    | Mug grasped                | Mug released    |    |
| 2 | Teabag reach     | Release of previous object | Teabag grasped  |    |
| 3 | Teabag transport | Teabag grasped             | Teabag released |   |
| 4 | Kettle reach     | Release of previous object | Kettle grasped  |  |
| 5 | Kettle transport | Kettle grasped             | Pour initiated  |  |
| 6 | Kettle pour      | Pour initiated             | Pour finished   |  |
| 7 | Kettle return    | Pour finished              | Kettle released |  |

|    |                 |                            |                      |                                                                                      |
|----|-----------------|----------------------------|----------------------|--------------------------------------------------------------------------------------|
| 8  | Sugar reach     | Release of previous object | Sugar grasped        |    |
| 9  | Sugar transport | Sugar grasped              | Sugar released       |    |
| 10 | Milk reach      | Release of previous object | Milk grasped         |    |
| 11 | Milk transport  | Milk grasped               | Pour initiated       |   |
| 12 | Milk pour       | Pour initiated             | Pour finished        |  |
| 13 | Milk return     | Pour finished              | Milk released        |  |
| 14 | Spoon reach     | Release of previous object | Spoon grasped        |  |
| 15 | Spoon transport | Spoon grasped              | Spoon emerged in tea |  |

|    |              |                        |                        |                                                                                    |
|----|--------------|------------------------|------------------------|------------------------------------------------------------------------------------|
| 16 | Spoon stir   | Spoon submerged in tea | Spoon emerged from tea |  |
| 17 | Spoon return | Spoon emerged from tea | Spoon released         |  |

**Table S2. Screenshots with all areas of interest highlighted in yellow.**

| <i>Area of interest (AOI)</i> | <i>Screenshot</i>                                                                    |
|-------------------------------|--------------------------------------------------------------------------------------|
| Mug                           | 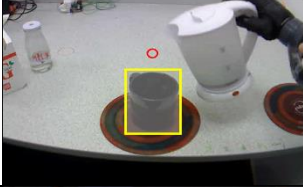  |
| Prosthesis                    |  |
| Place mat                     |  |
| Kettle GCA                    |  |
| Kettle upper                  |  |
| Kettle lower                  |  |

|             |                                                                                      |
|-------------|--------------------------------------------------------------------------------------|
| Kettle home |    |
| Teabag box  |    |
| Teabag      |    |
| Sugar cube  |    |
| Milk GCA    |   |
| Milk upper  |  |
| Milk home   |  |
| Spoon GCA   |  |
| Spoon lower |  |

Spoon home

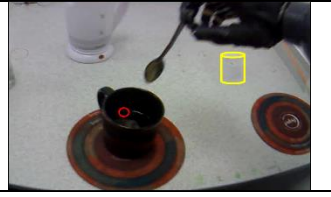

Supplement: MOESM1 [file 16682024]
